# Supplementary material for: Experimental signature of initial quantum coherence on entropy production
Source: Springer Nature journal article supplement (doi:10.1038/s41534-023-00738-0), 2023-09-11
Supplement: 41534_2023_738_MOESM1_ESM.pdf [file 41534_2023_738_MOESM1_ESM.pdf]

# Supplementary Information: Experimental signature of initial quantum coherence on entropy production

S. Hernández-Gómez,<sup>1,2,3,\*</sup> S. Gherardini,<sup>1,4,†</sup> A. Belenchia,<sup>5,6,‡</sup> A. Trombettoni,<sup>7,8,9,§</sup> M. Paternostro,<sup>6,¶</sup> and N. Fabbri<sup>1,3,\*\*</sup>

<sup>1</sup>European Laboratory for Non-linear Spectroscopy (LENS), Università di Firenze, I-50019 Sesto Fiorentino, Italy

<sup>2</sup>Dipartimento di Fisica e Astronomia, Università di Firenze, I-50019, Sesto Fiorentino, Italy

<sup>3</sup>Istituto Nazionale di Ottica del Consiglio Nazionale delle Ricerche (CNR-INO), I-50019 Sesto Fiorentino, Italy

<sup>4</sup>CNR-INO, Area Science Park, Basovizza, I-34149 Trieste, Italy

<sup>5</sup>Institut für Theoretische Physik, Eberhard-Karls-Universität Tübingen, 72076 Tübingen, German

<sup>6</sup>School of Mathematics and Physics, Queen's University Belfast, Belfast BT7 1NN, United Kingdom

<sup>7</sup>Department of Physics, University of Trieste, Strada Costiera 11, I-34151 Trieste, Italy

<sup>8</sup>SISSA and INFN, Sezione di Trieste, Via Bonomea 265, I-34136 Trieste, Italy

<sup>9</sup>CNR-IOM DEMOCRITOS Simulation Center and SISSA, Via Bonomea 265, I-34136 Trieste, Italy

In this document we detail the theoretical modelling of the photodynamics of the NV-center (Supplementary Note 1), and we report further experimental data concerning the reconstruction of the probability distribution resulting from the EPM scheme (Supplementary Note 2).

## Supplementary Note 1

### Theoretical modelling

In our experimental set-up, the photodynamics of the NV center is well described by a seven-level quantum model [1–3], which, however, can be effectively reduced to a two-level quantum system as detailed in the Supplementary Information of Refs. [3]. Here, for completeness of exposition, we report the modelling of this effective two-level open dynamics of the NV center, by resorting to the super-operator formalism [4] and working in the energy eigenbasis.

Let us thus model the NV center as a two-level quantum system subjected to a dissipative dynamics. The dissipative dynamics is induced by the laser pulses and it is described by the linear super-operators  $\mathbf{S} \in \mathbb{C}^{4 \times 4}$  acting directly on the column vector  $\text{col}[\rho_t] \in \mathbb{C}^{4 \times 1}$ , with  $\text{col}[\rho]$  denoting the vectorization of the density operator  $\rho \in \mathbb{C}^{2 \times 2}$ . The super-operator  $\mathbf{S}$  is explicitly given by

$$\mathbf{S} = \frac{1}{2} \begin{pmatrix} 2 - p_{\text{abs}}(k_c - p_d \cos \alpha) & p_{\text{abs}} k_{\text{sc}} & p_{\text{abs}} k_{\text{sc}} & p_{\text{abs}}(p_d \cos \alpha + k_c) \\ p_{\text{abs}}(k_{\text{sc}} + p_d \sin \alpha) & 2 - p_{\text{abs}}(1 + k_s) & -p_{\text{abs}}(k_s - 1) & p_{\text{abs}}(p_d \sin \alpha - k_{\text{sc}}) \\ p_{\text{abs}}(k_{\text{sc}} + p_d \sin \alpha) & -p_{\text{abs}}(k_s - 1) & 2 - p_{\text{abs}}(1 + k_s) & p_{\text{abs}}(p_d \sin \alpha - k_{\text{sc}}) \\ p_{\text{abs}}(k_c - p_d \cos \alpha) & -p_{\text{abs}} k_{\text{sc}} & -p_{\text{abs}} k_{\text{sc}} & 2 - p_{\text{abs}}(p_d \cos \alpha + k_c) \end{pmatrix}, \quad (1)$$

where

$$k_c = 1 - (1 - p_d)(\cos \alpha)^2, \quad k_s = 1 - (1 - p_d)(\sin \alpha)^2, \quad k_{\text{sc}} = (1 - p_d) \sin \alpha \cos \alpha, \quad (2)$$

$p_{\text{abs}}$  is the absorption probability,  $p_d$  is the probability of population transfer to  $|S_z = 0\rangle$ , and  $\alpha \in [0, \pi/2]$ .

The unitary dynamics in between two consecutive pulses is instead described by the linear operator

$$\mathbf{U} = \exp(-i\tau (H \otimes \mathbb{I}_2 - \mathbb{I}_2 \otimes H^*)) \quad (3)$$

with  $\hbar$  set to 1,  $\mathbb{I}_2$  denoting the  $2 \times 2$  identity matrix, and  $H = \omega \sigma_z/2$  the Hamiltonian of the effective two-level system.

Considering a total number of pulses  $N$  we thus have

$$\text{col}[\rho_t] = \mathbf{L} \text{col}[\rho_0] \quad \text{with} \quad \mathbf{L} \equiv (\mathbf{S}\mathbf{U})^N. \quad (4)$$

\* [shergom@mit.edu](mailto:shergom@mit.edu); These authors contributed equally to this work; Current address: Research Laboratory of Electronics, Massachusetts Institute of Technology, Cambridge, MA 02139, USA

† [stefano.gherardini@ino.cnr.it](mailto:stefano.gherardini@ino.cnr.it); These authors contributed equally to this work

‡ [alesio.belenchia@uni-tuebingen.de](mailto:alesio.belenchia@uni-tuebingen.de); These authors contributed equally to this work

§ [andreatr@sissa.it](mailto:andreatr@sissa.it)

¶ [m.paternostro@qub.ac.uk](mailto:m.paternostro@qub.ac.uk)

\*\* [fabbri@lens.unifi.it](mailto:fabbri@lens.unifi.it)

For a fixed set of values of the parameters  $(p_{\text{abs}}, p_{\text{d}}, \alpha, \tau, \omega)$ , the super-operator  $\mathbf{L}$  governing the open dynamics of the NV center possesses a unique steady-state  $\rho^*$  that is characterised by a non vanishing coherence in the energy basis.

The Kraus representation for  $\mathbf{L}$  can be uniquely determined by diagonalizing its Choi matrix

$$\mathbf{T} \equiv \sum_{k,j=0}^1 (E_{kj} \otimes \mathbb{I}_2) \mathbf{L} (\mathbb{I}_2 \otimes E_{kj}) = \sum_{\ell=0}^3 \xi_{\ell} \mathbf{u}_{\ell} \mathbf{u}_{\ell}^{\dagger} \quad (5)$$

where  $E_{kj} \equiv |k\rangle\langle j|$ , with  $|0\rangle \equiv (1, 0)^T$  and  $|1\rangle \equiv (0, 1)^T$ , and  $(\xi_{\ell}, \mathbf{u}_{\ell})$  denotes the  $j$ -th pair (eigenvalue, eigenvector) resulting from the eigenvector decomposition of  $\mathbf{T}$ . The Kraus operators  $\{K_{\ell}\}$  associated with the open map  $\mathbf{L}$  are thus implicitly provided by the following relation:

$$\text{col}[K_{\ell}] = \sqrt{\xi_{\ell}} \mathbf{u}_{\ell} \quad \text{such that} \quad \rho(t) = \sum_{\ell=0}^3 K_{\ell} \rho(0) K_{\ell}^{\dagger}. \quad (6)$$

One can easily determine that the open dynamics of the NV center is correctly described by three Kraus operators  $K_{\ell}$ . These Kraus operators can be then considered for the derivation of the backward dynamics as discussed in the main text.

## Supplementary Note 2

### Experimental data and simulation

As described in the main text, in our experiments we measure the EPM probability  $p_f^{\text{fin}}(\rho) = \text{tr}(\Pi_f^{\text{fin}} \Phi(\rho))$  i.e., the probability of obtaining  $E_f^{\text{fin}}$  when measuring the energy of the system at the final time  $t_{\text{fin}} = N\tau$  ( $N$  is the number of laser pulses and  $\tau$  is the time between them), assuming that the system is initialized into the state  $\rho$ . In particular, we performed four independent experiments for each of the four initial states:  $|0\rangle$ ,  $|1\rangle$ ,  $|+\rangle_y$ , and  $|-\rangle_y$ . The results of such measurements are shown in Fig. 1. Notice that we only measure the probability  $p_{f=1}^{\text{fin}}$  associated to the final excited state  $|1\rangle$ . This is because, for a two level system, the remaining probability is obtained as  $p_{f=0}^{\text{fin}} = 1 - p_{f=1}^{\text{fin}}$ . As mentioned in the main text, the classical mixtures we are interested in are a convex combination of these four pure states. For example, the EPM probability associated with the initial thermal state  $\rho_{\text{th}}^{\text{in}} = e^{-\beta H_{\text{in}}} / Z_{\text{in}}$  is obtained as  $p_f^{\text{fin}}(\rho_{\text{th}}^{\text{in}}) = p(E_0^{\text{in}}) p_f^{\text{fin}}(|0\rangle\langle 0|) + p(E_1^{\text{in}}) p_f^{\text{fin}}(|1\rangle\langle 1|)$ , where  $p(E_i^{\text{in}}) = e^{-\beta E_i} / Z_{\text{in}}$ . Similarly, the probability  $p_f^{\text{fin}}(\rho_0)$  for a given initial state (see main text)  $\rho_0 = p|1\rangle\langle 1| + (1-p)|+\rangle_y\langle +|$ , with  $p \in [0, 1]$ , is obtained as  $p_f^{\text{fin}}(\rho_0) = p p_f^{\text{fin}}(|1\rangle\langle 1|) + (1-p) p_f^{\text{fin}}(|+\rangle_y\langle +|)$ .

In Supplementary Figure 1 we compare the experimental data with the numerical simulation of the dynamics, using the model described in the previous section. The values of the parameters  $p_{\text{abs}}$ , and  $p_{\text{d}}$  are selected by minimizing the sum of the squares of the residuals between data and simulation.

In Fig. 2 of the main text we show the results of the irreversible entropy production  $\Delta\Sigma$  obtained for an initial state  $|+\rangle_y$ . In Supplementary Figure 2 we present similar results but for the initial state  $|-\rangle_y = (|0\rangle - i|1\rangle)/\sqrt{2}$ .

- 
- [1] Wolters, J., Strauß, M., Schoenfeld, R. S. & Benson, O. Quantum zeno phenomenon on a single solid-state spin. *Phys. Rev. A* **88**, 020101 (2013).
  - [2] Manson, N. B., Harrison, J. P. & Sellars, M. J. Nitrogen-vacancy center in diamond: Model of the electronic structure and associated dynamics. *Phys. Rev. B* **74**, 104303 (2006).
  - [3] Hernández-Gómez, S. *et al.* Experimental test of exchange fluctuation relations in an open quantum system. *Phys. Rev. Research* **2**, 023327 (2020).
  - [4] Havel, T. F. Robust procedures for converting among lindblad, kraus and matrix representations of quantum dynamical semigroups. *J. Math. Phys.* **44**, 534–557 (2003).

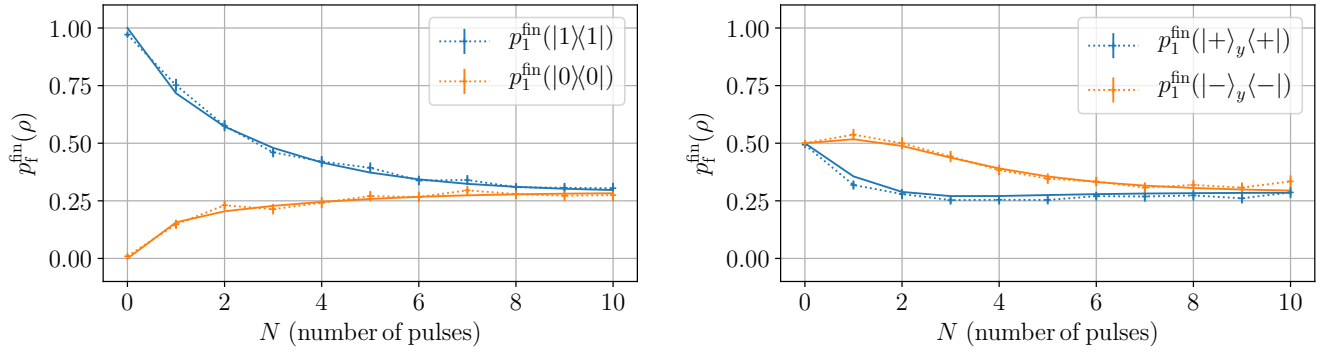

Supplementary Figure 1. **EPM final probabilities.** Measurements of the EPM protocol as a function of the number  $N$  of pulses for the initial pure states  $\{|0\rangle, |1\rangle, |+\rangle_y, |-\rangle_y\}$ . The crosses with error bars are the experimental data (dotted line is a guide to the eye). Solid lines represent the numerical simulation of the dynamics described in the previous section, using the parameters  $p_{\text{abs}} = 0.700$  and  $p_d = 0.255$ . As mentioned in the main text, the other parameters are  $\alpha = \pi/4$  (i.e.,  $\delta = -\Omega$ ),  $\tau\omega \simeq (2\pi)0.9$ , and  $\tau = 190$  ns. The error bars correspond to the standard deviation of the normalized photo-luminescence (see Methods in the main text).

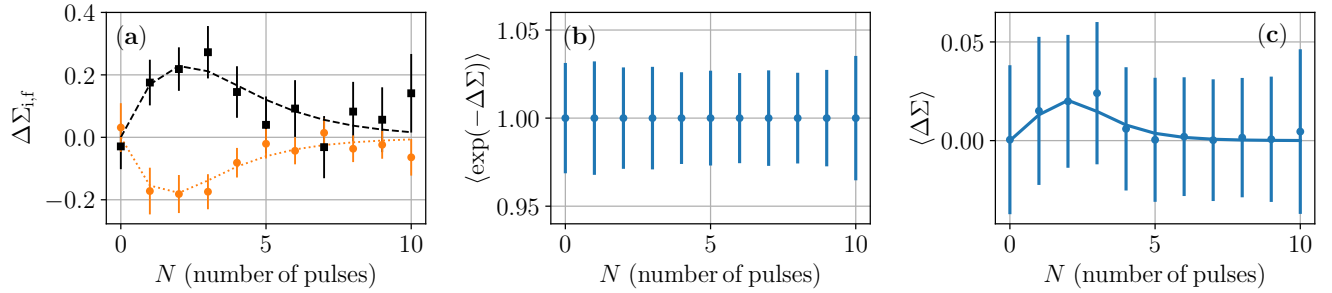

Supplementary Figure 2. **Coherence-affected entropy production.** Panel (a): Experimental values (markers with error bars) of the irreversible entropy production. Black squares are  $\Delta\Sigma_{1,1} = \Delta\Sigma_{0,1}$ , and orange bullets are  $\Delta\Sigma_{1,0} = \Delta\Sigma_{0,0}$ . Dashed black line and dotted orange line are the corresponding numerical simulations. Panel (b): Experimental verification of the fluctuation theorem  $\langle e^{-\Delta\Sigma} \rangle_{\Gamma} = 1$  [Eq. (6) of the main text], for the coherence-affected irreversible entropy production, as a function of the number  $N$  of pulses used to drive the dynamics of the NV center. Panel (c): Average experimental coherence-affected entropy production as a function of  $N$  (blue circles). In all panels, the experimental data are plotted against the predictions (from the numerical simulations) that are obtained by taking  $|-\rangle_y = (|0\rangle - i|1\rangle)/\sqrt{2}$  as the initial quantum state.
